# Supplementary material for: Photochemical processes induced by the irradiation of 4-hydroxybenzophenone in different solvents
Source: Royal Society of Chemistry journal article supplement (doi:10.1039/c5pp00214a), 2015-09-25
Supplement: c5pp00214a1.pdf [file c5pp00214a1.pdf]

## ELECTRONIC SUPPLEMENTARY INFORMATION

### Photochemical processes induced by the irradiation of 4-hydroxybenzophenone in different solvents

**Francesco Barsotti,<sup>a</sup> Marcello Brigante<sup>b,\*</sup>, Mohamed Sarakha,<sup>b</sup> Claudio Minero,<sup>a</sup>  
Davide Vione<sup>a,c,\*</sup>**

<sup>a</sup> *Dipartimento di Chimica, Università di Torino, Via Pietro Giuria 5, 10125 Torino, Italy.*

<sup>b</sup> *Clermont Université, Université Blaise Pascal, Institut de Chimie de Clermont-Ferrand, BP 10448, F-63000 Clermont-Ferrand, France.*

<sup>c</sup> *Centro Interdipartimentale NatRisk, Università di Torino, Via L. Da Vinci 44, 10095 Grugliasco (TO), Italy.*

\* Address correspondence to either author: *marcello.brigante@univ-bpclermont.fr*  
*davide.vione@unito.it*

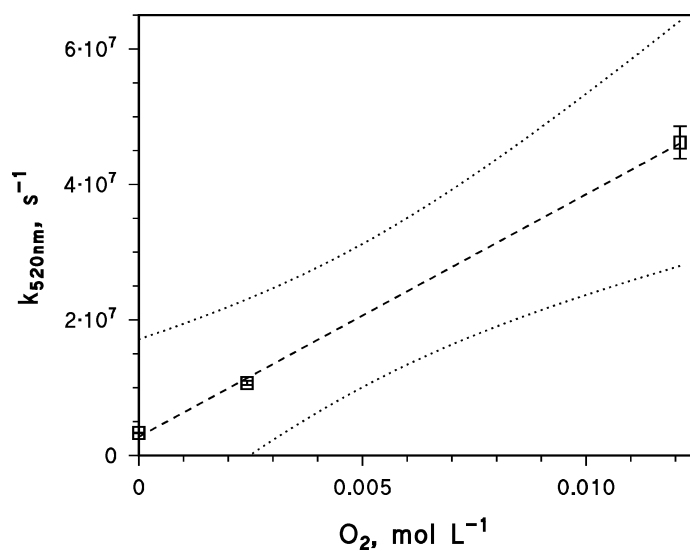

**Figure ESI1.** Trend of the first-order decay constant of the absorbance at 520 nm, as a function of the concentration of dissolved oxygen in acetonitrile. 4BPOH 0.1 mM, laser excitation at 355 nm, 94 mJ/pulse.

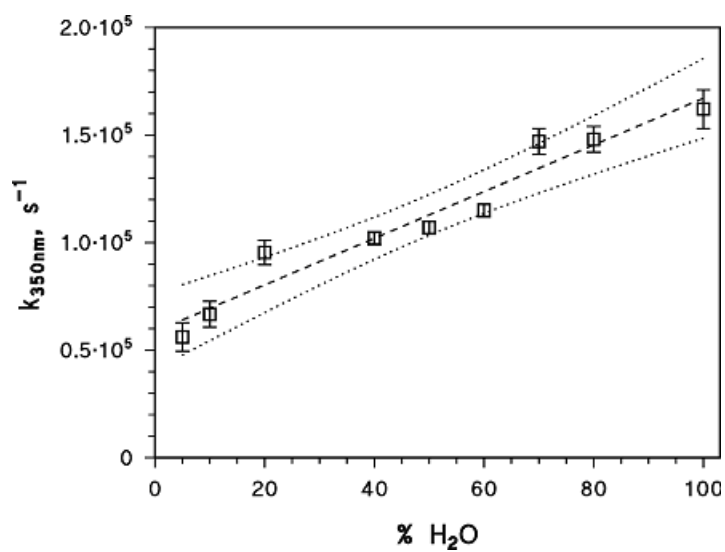

**Figure ESI2.** Trend of the first-order decay constant of the absorbance at 350 nm, as a function of the percentage of water in binary mixtures H<sub>2</sub>O/CH<sub>3</sub>CN. 4BPOH 0.1 mM, laser excitation at 355 nm, 94 mJ/pulse.

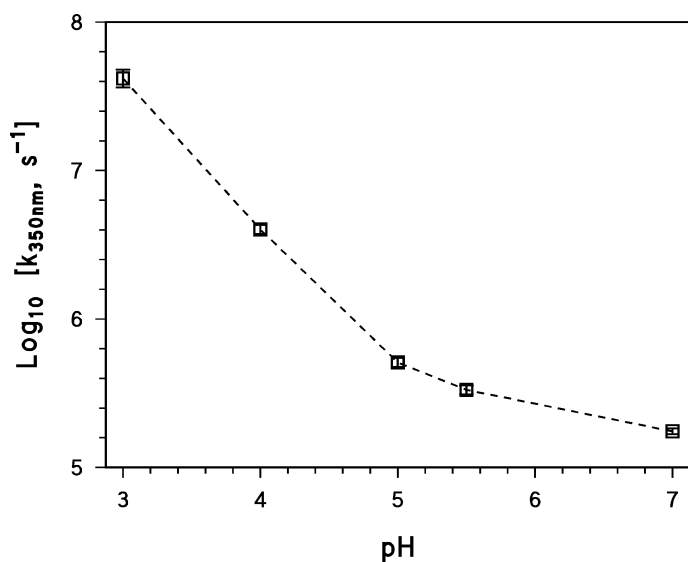

**Figure ESI3.** Trend of the first-order decay constant of the absorbance at 350 nm (decimal logarithm), as a function of the pH of the aqueous solution, adjusted with HClO<sub>4</sub>. 4BPOH 0.1 mM, laser excitation at 355 nm, 94 mJ/pulse.

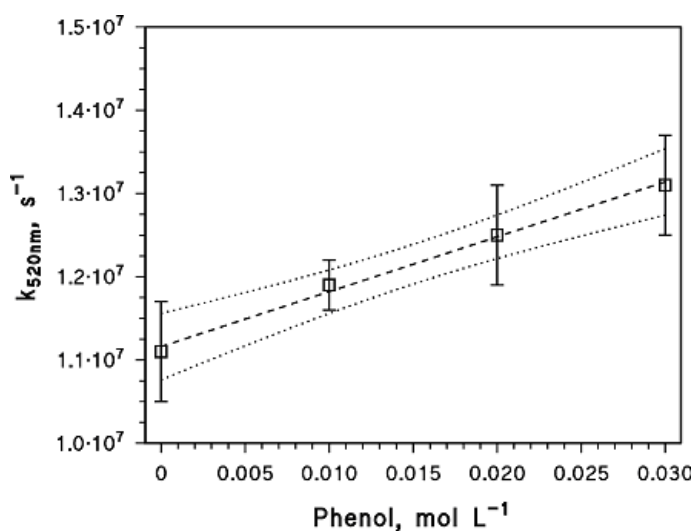

**Figure ESI4.** Trend of the first-order decay constant of the absorbance at 520 nm, as a function of phenol concentration in acetonitrile. 4BPOH 0.1 mM, laser excitation at 355 nm, 94 mJ/pulse.

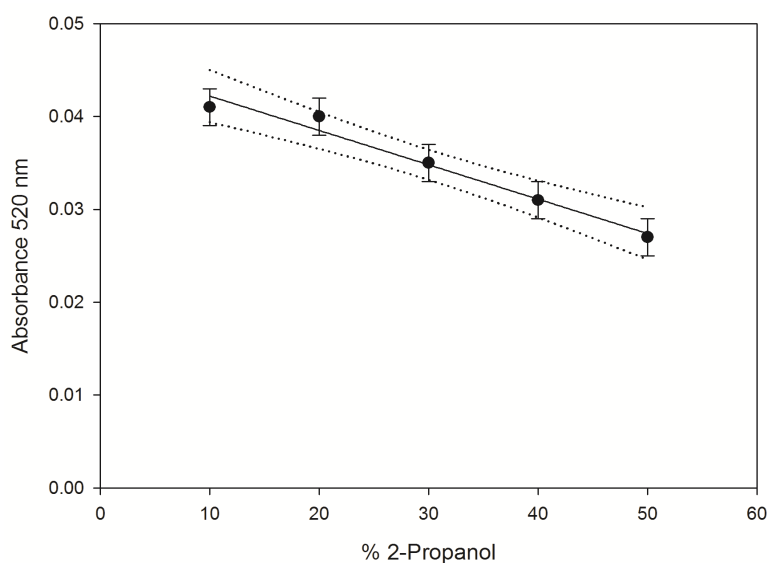

**Figure ESI5.** Trend of the Absorbance at 520 nm, as a function of the percentage of 2-propanol in binary mixtures 2-propanol/CH<sub>3</sub>CN. 4BPOH 0.1 mM, laser excitation at 355 nm, 94 mJ/pulse.

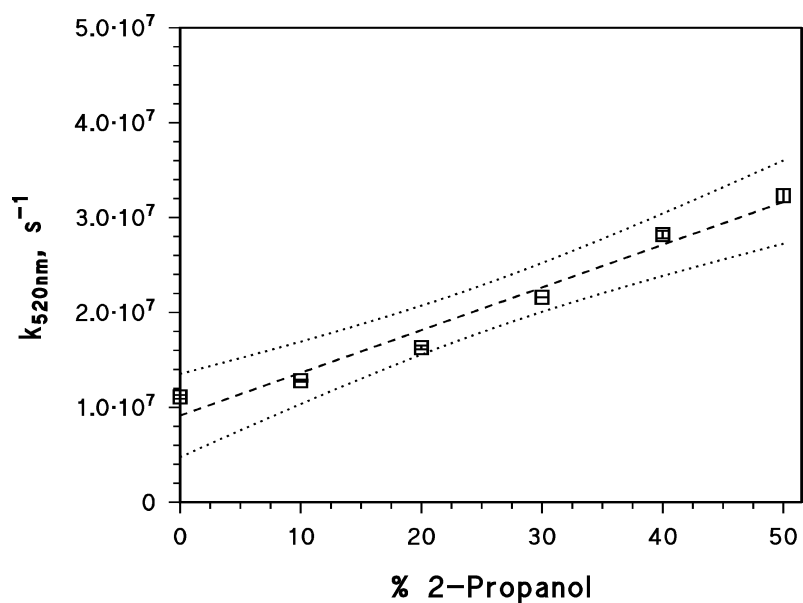

**Figure ESI6.** Trend of the first-order decay constant of the absorbance at 520 nm, as a function of the percentage of 2-propanol in binary mixtures 2-propanol/CH<sub>3</sub>CN. 4BPOH 0.1 mM, laser excitation at 355 nm, 94 mJ/pulse. The second-order reaction rate constant between <sup>3</sup>4BPOH\* and 2-propanol was derived taking into account the fact that 100% 2-propanol is 13.1 M.

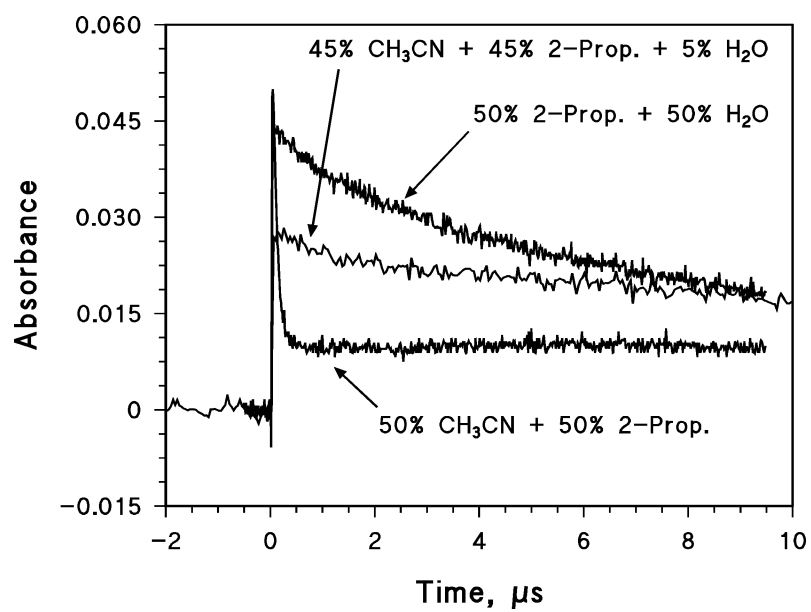

**Figure ESI7.** Time trend of the laser traces at 350 nm (355 nm laser irradiation, 94 mJ/pulse), in different mixtures of acetonitrile, 2-propanol and water (see the figure legends).
